# Supplementary material for: Identification of lung cancer breath biomarkers based on perioperative breathomics testing: A prospective observational study
Source: PubMed Central journal article supplement — eClinicalMedicine. 2022 Apr 16;47:101384. doi: 10.1016/j.eclinm.2022.101384 (PMC9035731; doi:10.1016/j.eclinm.2022.101384), 2022-04-16
Supplement: mmc1.pdf [file mmc1.pdf]

## **Supplemental Tables and Figures**

**Table S1:** Potential breath biomarkers for lung cancer based on literature review (pg. 2).

**Table S2:** Performance of volatile organic compounds in diagnosing lung cancer patients from healthy individuals (pg. 3).

**Figure S1:** Comparisons of spectrum peak intensity of volatile organic compounds between lung adenocarcinomas and other cancer types (pg. 4)

**Figure S2:** Comparisons of spectrum peak intensity of volatile organic compounds among lung cancers with different pathological stage (pg. 5)

Table S1 Potential breath biomarkers for lung cancer based on literature review.

| Volatile organic compounds | Molecular formula                             | Molecular weight | m/z values     | PubChem CID |
|----------------------------|-----------------------------------------------|------------------|----------------|-------------|
| Acetaldehyde               | C <sub>2</sub> H <sub>4</sub> O               | 44.05            | 44.05, 45.05   | 177         |
| Ethanol                    | C <sub>2</sub> H <sub>6</sub> O               | 46.07            | 46.07, 47.07   | 702         |
| Propionaldehyde            | C <sub>3</sub> H <sub>6</sub> O               | 58.08            | 58.08, 59.08   | 527         |
| Propanol                   | C <sub>3</sub> H <sub>8</sub> O               | 60.10            | 60.10, 61.10   | 1031        |
| 2-Hydroxyacetaldehyde      | C <sub>2</sub> H <sub>4</sub> O <sub>2</sub>  | 61.04            | 61.04, 62.04   | 756         |
| Dimethyl sulfide           | C <sub>2</sub> H <sub>6</sub> S               | 62.14            | 62.14          | 1068        |
| Isoprene                   | C <sub>5</sub> H <sub>8</sub>                 | 68.12            | 68.12          | 6557        |
| Butanal                    | C <sub>4</sub> H <sub>8</sub> O               | 72.11            | 72.11, 73.11   | 261         |
| Benzene                    | C <sub>6</sub> H <sub>6</sub>                 | 78.11            | 78.11          | 241         |
| Pentanal                   | C <sub>5</sub> H <sub>10</sub> O              | 86.13            | 86.13, 87.13   | 8063        |
| Butyric acid               | C <sub>4</sub> H <sub>8</sub> O <sub>2</sub>  | 88.11            | 88.11, 89.11   | 264         |
| Toluene                    | C <sub>7</sub> H <sub>8</sub>                 | 92.14            | 92.14          | 1140        |
| Phenol                     | C <sub>6</sub> H <sub>6</sub> O               | 94.11            | 94.11, 95.11   | 996         |
| 2, 5-Dimethylfuran         | C <sub>6</sub> H <sub>8</sub> O               | 96.13            | 96.13          | 12266       |
| Cyclohexanone              | C <sub>6</sub> H <sub>10</sub> O              | 98.14            | 98.14          | 7967        |
| Hexanal                    | C <sub>6</sub> H <sub>12</sub> O              | 100.16           | 100.16, 101.16 | 6184        |
| Propyl acetate             | C <sub>5</sub> H <sub>10</sub> O <sub>2</sub> | 102.13           | 102.13, 103.13 | 7997        |
| Styrene                    | C <sub>8</sub> H <sub>8</sub>                 | 104.15           | 104.15         | 7501        |
| Benzaldehyde               | C <sub>7</sub> H <sub>6</sub> O               | 106.12           | 106.12, 107.12 | 240         |
| Heptanal                   | C <sub>7</sub> H <sub>14</sub> O              | 114.19           | 114.19, 115.19 | 8130        |
| 4-Hydroxyhexanal           | C <sub>6</sub> H <sub>12</sub> O <sub>2</sub> | 116.16           | 116.16, 117.16 | 131022      |
| Acetophenone               | C <sub>8</sub> H <sub>8</sub> O               | 120.15           | 120.15, 121.15 | 7410        |
| Propylcyclohexane          | C <sub>9</sub> H <sub>18</sub>                | 126.24           | 126.24         | 15505       |
| Octanal                    | C <sub>8</sub> H <sub>16</sub> O              | 128.21           | 128.21, 129.21 | 454         |
| Benzothiazole              | C <sub>7</sub> H <sub>5</sub> NS              | 135.19           | 135.19         | 7222        |
| Nonanal                    | C <sub>9</sub> H <sub>18</sub> O              | 142.24           | 142.24, 143.24 | 31289       |
| Decanal                    | C <sub>10</sub> H <sub>20</sub> O             | 156.26           | 156.26, 157.26 | 8175        |
| 2, 2-Dimethyldecane        | C <sub>12</sub> H <sub>26</sub>               | 170.33           | 170.33         | 28459       |

We reviewed the original studies included in the following four reviews to select potential breath biomarkers of lung cancer. Lung cancer-related volatile organic compounds that had been reported in not less than two original studies were selected as potential breath biomarkers.

1. Ratiu IA, Ligor T, Bocos-Bintintan V, Mayhew CA, Buszewski B. Volatile Organic Compounds in Exhaled Breath as Fingerprints of Lung Cancer, Asthma and COPD. *J Clin Med.* 2020; 10(1). DOI: 10.3390/jcm10010032.
2. Marzorati D, Mainardi L, Sedda G, Gasparri R, Spaggiari L, Cerveri P. A review of exhaled breath: a key role in lung cancer diagnosis. *J Breath Res.* 2019; 13(3): 034001. DOI: 10.1088/1752-7163/ab0684.
3. Hanna GB, Boshier PR, Markar SR, Romano A. Accuracy and Methodologic Challenges of Volatile Organic Compound-Based Exhaled Breath Tests for Cancer Diagnosis: A Systematic Review and Meta-analysis. *JAMA Oncol.* 2019; 5(1): e182815. DOI: 10.1001/jamaoncol.2018.2815.
4. Campanella A, De Summa S, Tommasi S. Exhaled breath condensate biomarkers for lung cancer. *J Breath Res.* 2019; 13(4): 044002. DOI: 10.1088/1752-7163/ab2f9f.

Table S2 Performance of volatile organic compounds in diagnosing lung cancer patients from healthy individuals.

| Volatile organic compounds | Diagnosis performance |             |             |       |       |          |
|----------------------------|-----------------------|-------------|-------------|-------|-------|----------|
|                            | AUC (95% CI)          | Sensitivity | Specificity | PPV   | NPV   | Accuracy |
| Acetaldehyde               | 0.563 (0.506-0.621)   | 27.4%       | 87.5%       | 48.3% | 73.9% | 69.5%    |
| 2-Hydroxyacetaldehyde      | 0.596 (0.542-0.649)   | 49.0%       | 69.3%       | 40.5% | 76.1% | 63.2%    |
| Isoprene                   | 0.859 (0.817-0.901)   | 77.7%       | 85.6%       | 69.7% | 90.0% | 83.2%    |
| Pentanal                   | 0.797 (0.756-0.838)   | 69.4%       | 79.9%       | 59.6% | 86.0% | 76.8%    |
| Butyric acid               | 0.623 (0.574-0.671)   | 77.7%       | 48.6%       | 39.2% | 83.6% | 57.3%    |
| Toluene                    | 0.722 (0.671-0.773)   | 59.9%       | 76.4%       | 51.9% | 81.7% | 71.4%    |
| 2,5-Dimethylfuran          | 0.694 (0.642-0.745)   | 58.0%       | 78.8%       | 53.8% | 81.5% | 72.6%    |
| Cyclohexanone              | 0.723 (0.675-0.770)   | 73.9%       | 59.0%       | 43.4% | 84.1% | 63.4%    |
| Hexanal                    | 0.843 (0.805-0.881)   | 73.9%       | 83.4%       | 65.5% | 88.2% | 80.6%    |
| Heptanal                   | 0.751 (0.706-0.797)   | 68.2%       | 70.4%       | 49.5% | 83.8% | 69.7%    |
| Acetophenone               | 0.676 (0.623-0.728)   | 58.0%       | 73.9%       | 48.7% | 80.5% | 69.1%    |
| Propylcyclohexane          | 0.797 (0.753-0.841)   | 70.1%       | 78.5%       | 58.2% | 86.0% | 76.0%    |
| Octanal                    | 0.723 (0.677-0.769)   | 85.4%       | 48.6%       | 41.5% | 88.6% | 59.6%    |
| Nonanal                    | 0.790 (0.745-0.834)   | 66.9%       | 81.0%       | 60.0% | 85.1% | 76.8%    |
| Decanal                    | 0.734 (0.685-0.783)   | 44.6%       | 92.4%       | 71.4% | 79.6% | 78.1%    |
| 2,2-Dimethyldecane         | 0.778 (0.732-0.824)   | 64.3%       | 80.4%       | 58.4% | 84.1% | 75.6%    |

AUC: area under the curve; CI: confidence interval; NPV: negative predictive value; PPV: positive predictive value.

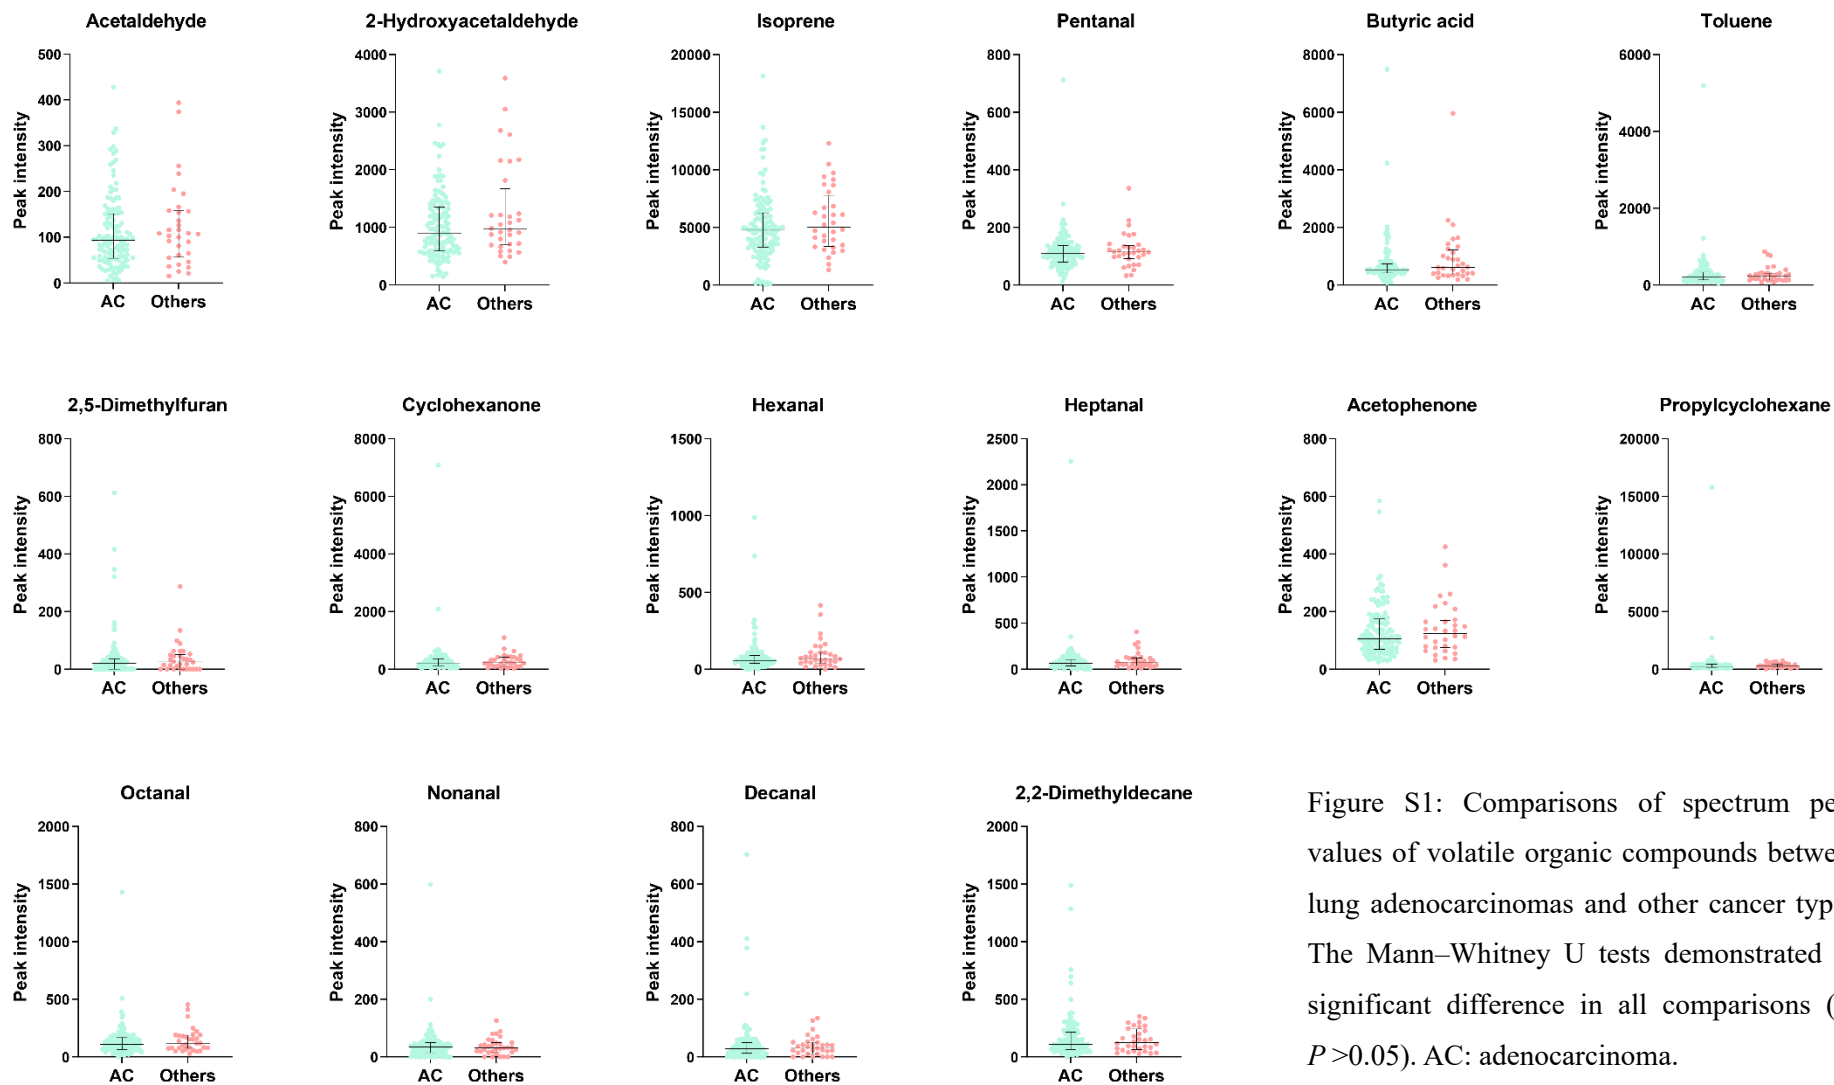

Figure S1: Comparisons of spectrum peak values of volatile organic compounds between lung adenocarcinomas and other cancer types. The Mann-Whitney U tests demonstrated no significant difference in all comparisons (all  $P > 0.05$ ). AC: adenocarcinoma.

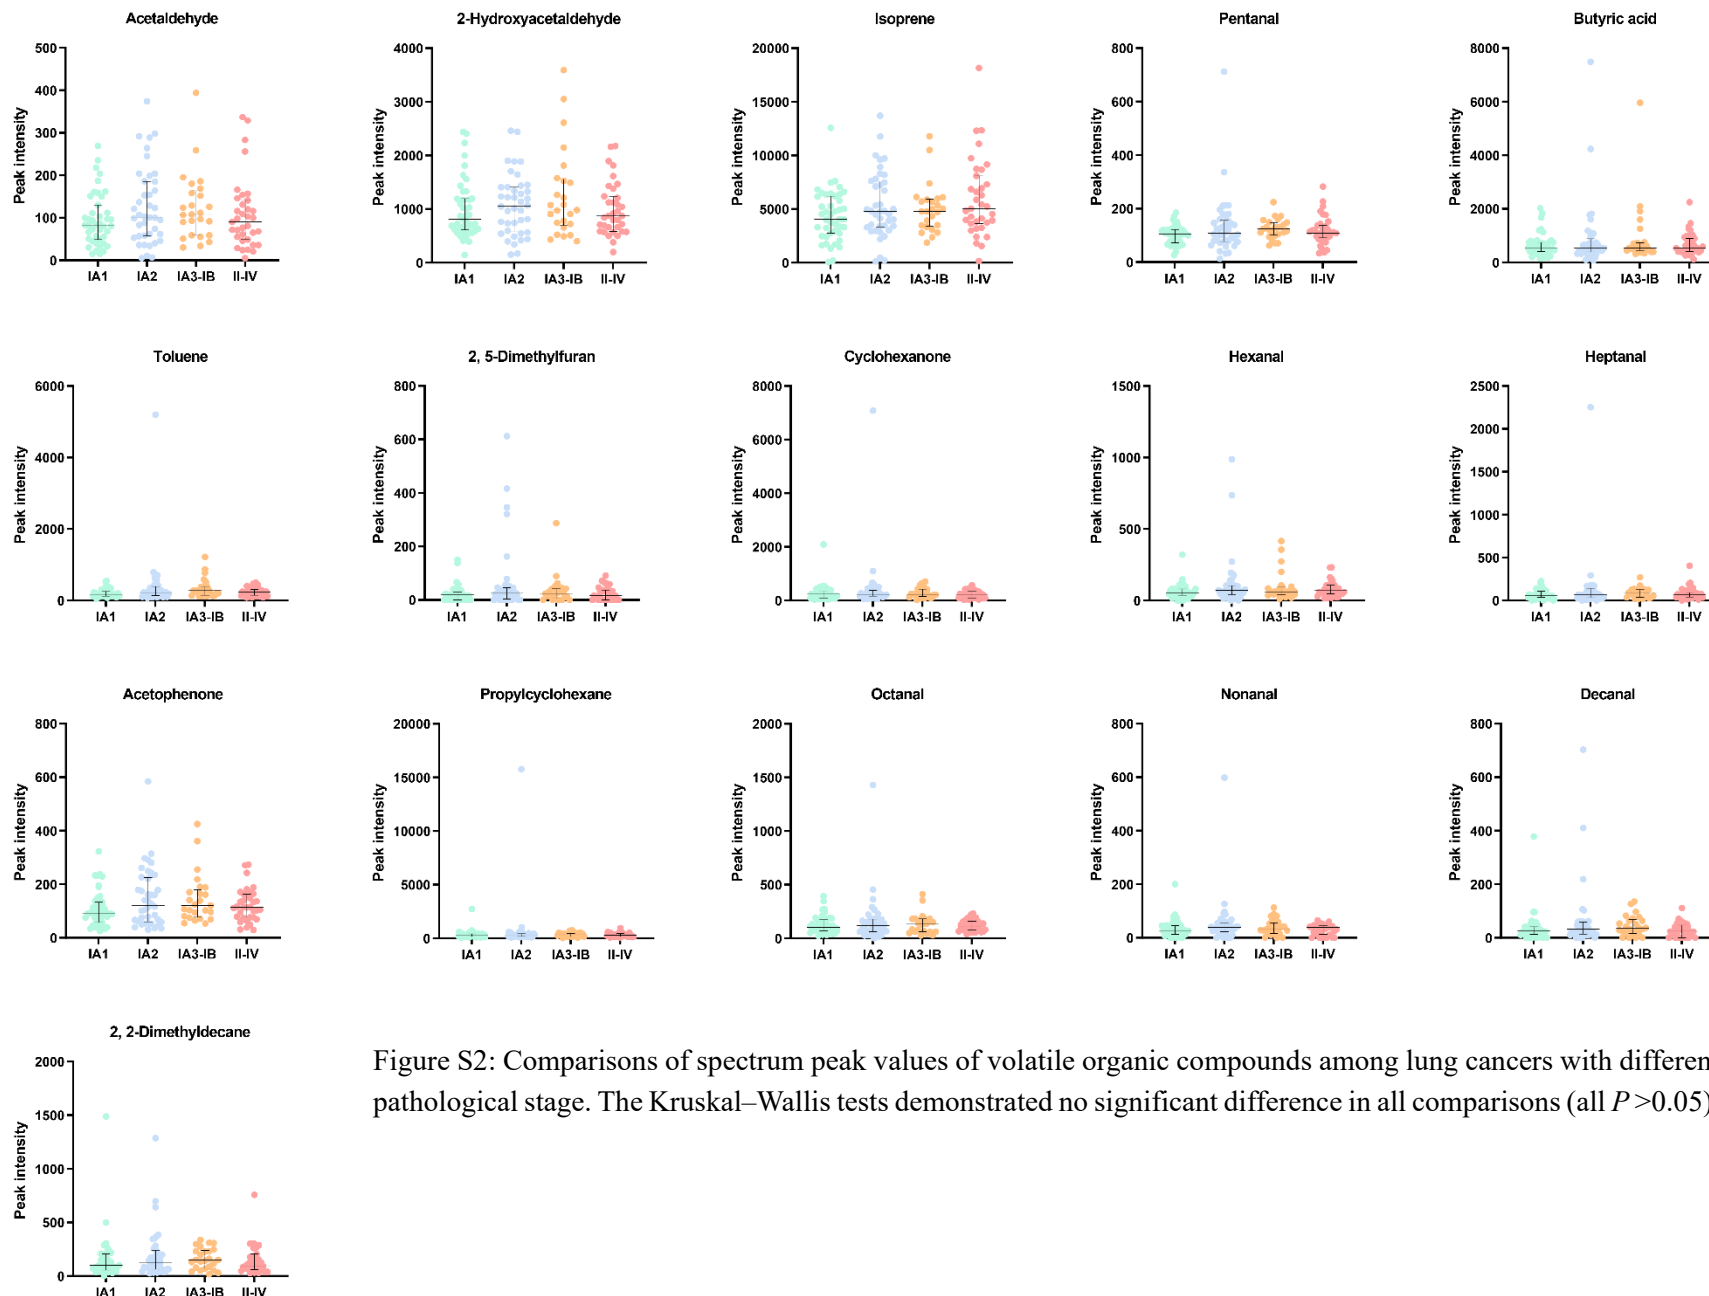

Figure S2: Comparisons of spectrum peak values of volatile organic compounds among lung cancers with different pathological stage. The Kruskal–Wallis tests demonstrated no significant difference in all comparisons (all  $P > 0.05$ ).
